# Supplementary material for: Diabetes Prevalence and Associated Risk Factors among Adults in Rural Herat Province, Afghanistan: A Community-Based Cross-Sectional Study
Source: Research Square preprint supplement (doi:10.21203/rs.3.rs-7948496/v1), 2025-11-19
Supplement: Supplementary file 1 [file c39ced8291c5cba13e16b1d3.docx]

# STROBE Statement Checklist – Cross‑Sectional Study (Revised: section‑referenced)

Manuscript: “Diabetes Prevalence and Associated Risk Factors among Adults in Rural Herat Province, Afghanistan: A Community‑Based Cross‑Sectional Study”

Note: This checklist references manuscript sections (e.g., Methods – Participants) rather than absolute page numbers to ensure consistency regardless of formatting changes.

| Item No. | STROBE Recommendation | Reported in the manuscript (section / table / figure) | Comments / Notes (if any) |
| --- | --- | --- | --- |
| 1 | Indicate the study design in the title or abstract. | Title; Abstract – Methods | Study design (“community‑based cross‑sectional”) stated in title and abstract. |
| 2 | Explain the scientific background and rationale. | Introduction – Background | Background and rationale provided. |
| 3 | State specific objectives and hypotheses. | Introduction – Objectives | Primary objective clearly stated: estimate prevalence of diabetes and associated risk factors. |
| 4 | Present key elements of study design early in the paper. | Methods – Study design | WHO STEPS approach mentioned. |
| 5 | Describe the setting, locations, and dates of data collection. | Methods – Setting / Study period | Rural Herat; data collection Jan–Dec 2024. |
| 6 | Give eligibility criteria and describe methods of participant selection. | Methods – Participants / Sampling | Eligibility criteria; multistage sampling with PPS and Kish method described. |
| 7 | Define outcomes, exposures, predictors, potential confounders, and effect modifiers. | Methods – Variables / Definitions | Definitions for diabetes, hypertension, BMI, waist circumference included. |
| 8 | For each variable, give sources of data and details of methods of assessment (measurement). | Methods – Data collection / Laboratory methods | WHO STEPS questionnaire, measurement devices, analyzer described. QC mention recommended. |
| 9 | Describe efforts to address potential sources of bias. | Methods – Quality assurance; Discussion – Limitations | Training and standardization mentioned; consider adding explicit measures to reduce bias. |
| 10 | Explain how the study size was arrived at. | Methods – Sample size calculation | Cochran formula (DE=1.5; 10% non‑response) described. |
| 11 | Explain handling of quantitative variables in analyses. | Methods – Data management / Variable categorisation | Age, BMI categories defined. |
| 12a | Describe statistical methods including confounding control. | Methods – Statistical analysis | SPSS v26; univariable and multivariable logistic regression; entry criterion p<0.20 noted. |
| 12b | Describe methods for subgroup or interaction analyses. | Methods – Statistical analysis | Not performed. |
| 12c | Explain handling of missing data. | Methods – Data management | Mentioned generally; specify complete‑case or imputation if possible. |
| 12d | If applicable, describe analytical methods accounting for sampling strategy. | Methods – Sampling / Statistical analysis | Clarify whether sampling weights were used. |
| 13a | Report numbers of individuals at each stage of study. | Results – Participants | 643 selected, 609 analyzed; flow diagram recommended. |
| 13b | Give reasons for non‑participation. | Results – Participants | Reasons briefly described; add counts per reason. |
| 14a | Give participant characteristics and exposures/confounders. | Results – Table 1 (Baseline characteristics) | Demographic and clinical variables reported. |
| 14b | Indicate number with missing data per variable. | Results – Table 1 | Add missing data column if feasible. |
| 15 | Report numbers of outcome events or summary measures. | Results – Outcomes (Prevalence) | Diabetes prevalence (7.55%; 95% CI 5.6–9.9) and counts reported. |
| 16a | Give unadjusted and adjusted estimates with precision and list confounders. | Results – Tables 2–3 | Adjusted ORs reported; list covariates in table footnotes. |
| 16b | Report category boundaries for categorized variables. | Methods – Variable categorisation | BMI, WC, age groups specified. |
| 17 | Report other analyses (subgroups, sensitivity, interactions). | Results / Supplementary | No additional analyses; consider sensitivity analyses. |
| 18 | Summarize key results with reference to objectives. | Discussion – Summary of findings | Key results summarized. |
| 19 | Discuss limitations. | Discussion – Limitations | Cross‑sectional design, single FPG, recall bias discussed. |
| 20 | Give cautious overall interpretation. | Discussion – Interpretation | Interpretation contextualized with other studies. |
| 21 | Discuss generalisability. | Discussion – Generalisability | Applicable to rural Herat; limited national generalisability. |
| 22 | Give funding source and role of funders. | Declarations – Funding | Jami University; no funder role. |
| 23 | Give name of ethics committee and reference number. | Declarations – Ethics approval | Ethics approval code provided. |
| 24 | State informed consent procedures. | Declarations – Consent | Verbal/written consent obtained. |
| 25 | Describe availability of data/code/materials. | Declarations – Data availability | Available upon request. |
| 26 | Declare competing interests. | Declarations – Competing interests | No conflicts declared. |
| 27 | Give authors’ contributions. | Declarations – Authors’ contributions | Roles listed. |
| 28 | List acknowledgements. | Acknowledgements | Acknowledgements provided. |
| 29 | Registration number and name of trial registry. | Not applicable | Observational study, not registered trial. |
| 30 | Access to study protocol. | Declarations – Protocol | Not publicly available; may be provided on request. |
| 31 | Indicate where the completed checklist is stored. | Supplementary file | Checklist uploaded separately. |
| 32 | Access to full dataset or analytic code. | Declarations – Data availability | Available on request from corresponding author. |

Prepared for submission to BMC Public Health.

This version references manuscript sections to ensure accuracy regardless of pagination changes.

Date: 25 October 2025
